# Supplementary figures and images for: Comparison of Transcriptional Signatures of Three Staphylococcal Superantigenic Toxins in Human Melanocytes
Source: MDPI journal article supplement (doi:10.3390/biomedicines10061402), 2022-06-14

# Figure S1

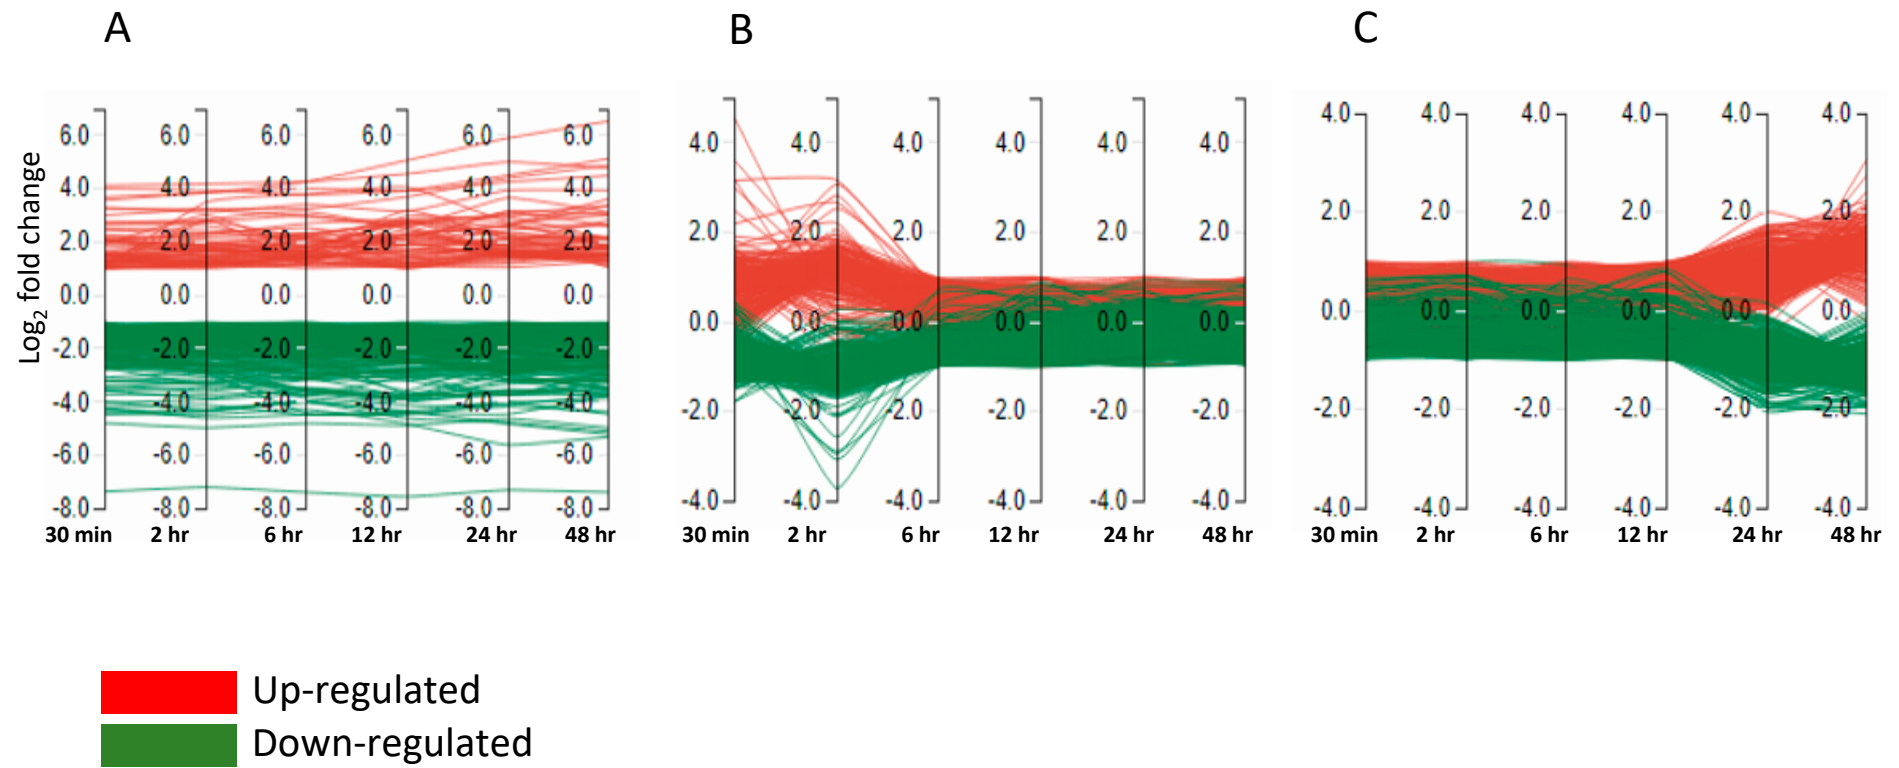

# Figure S2

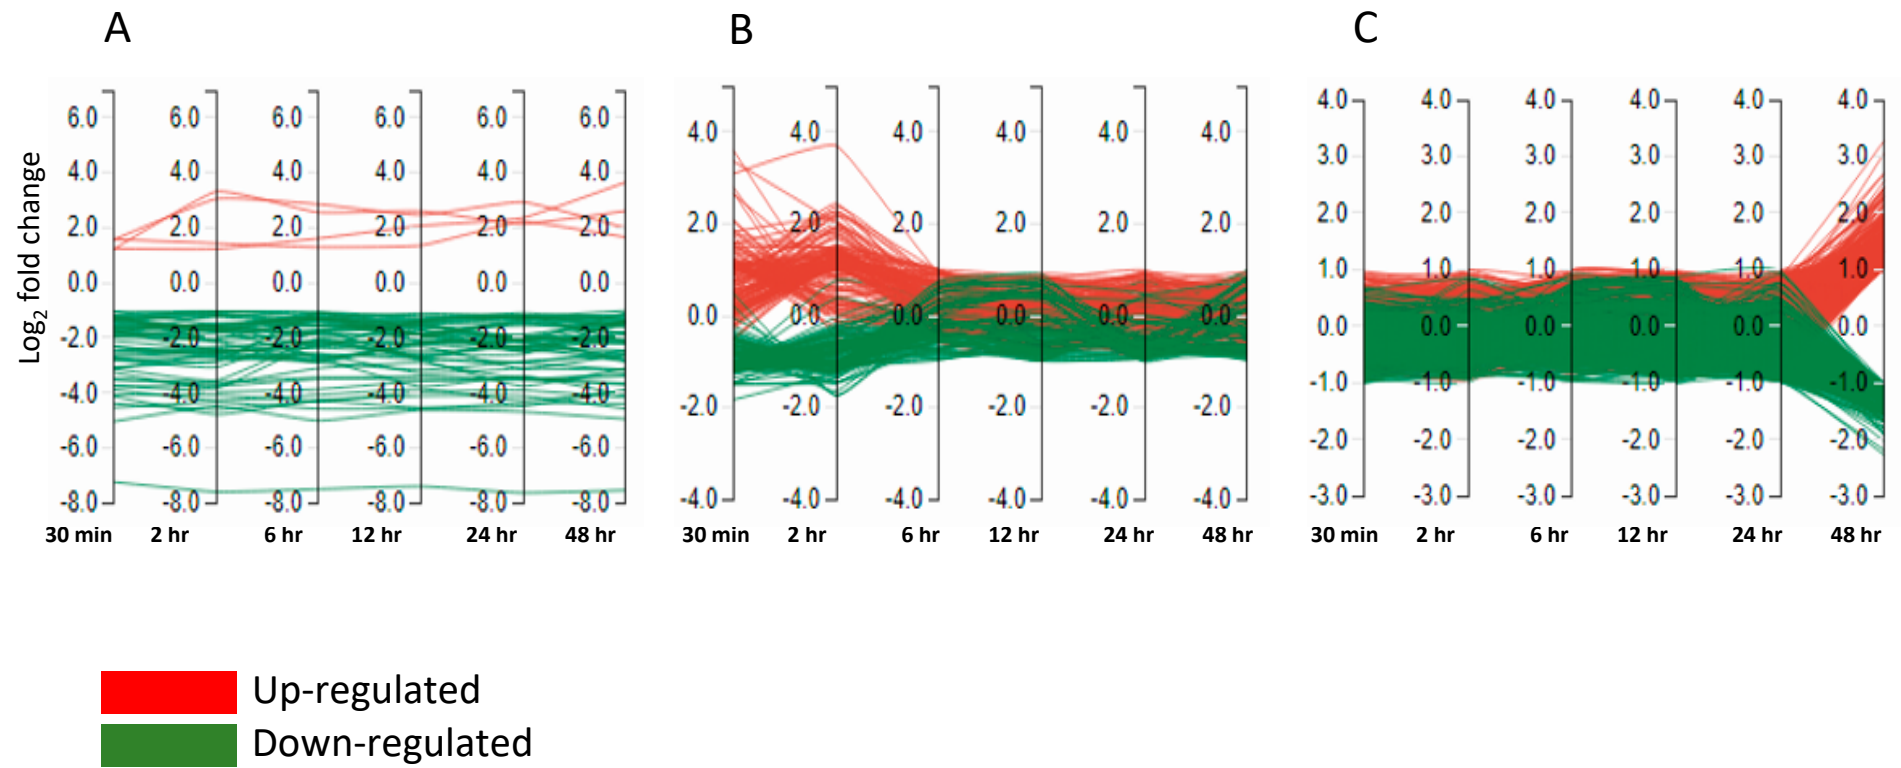

# Figure S3

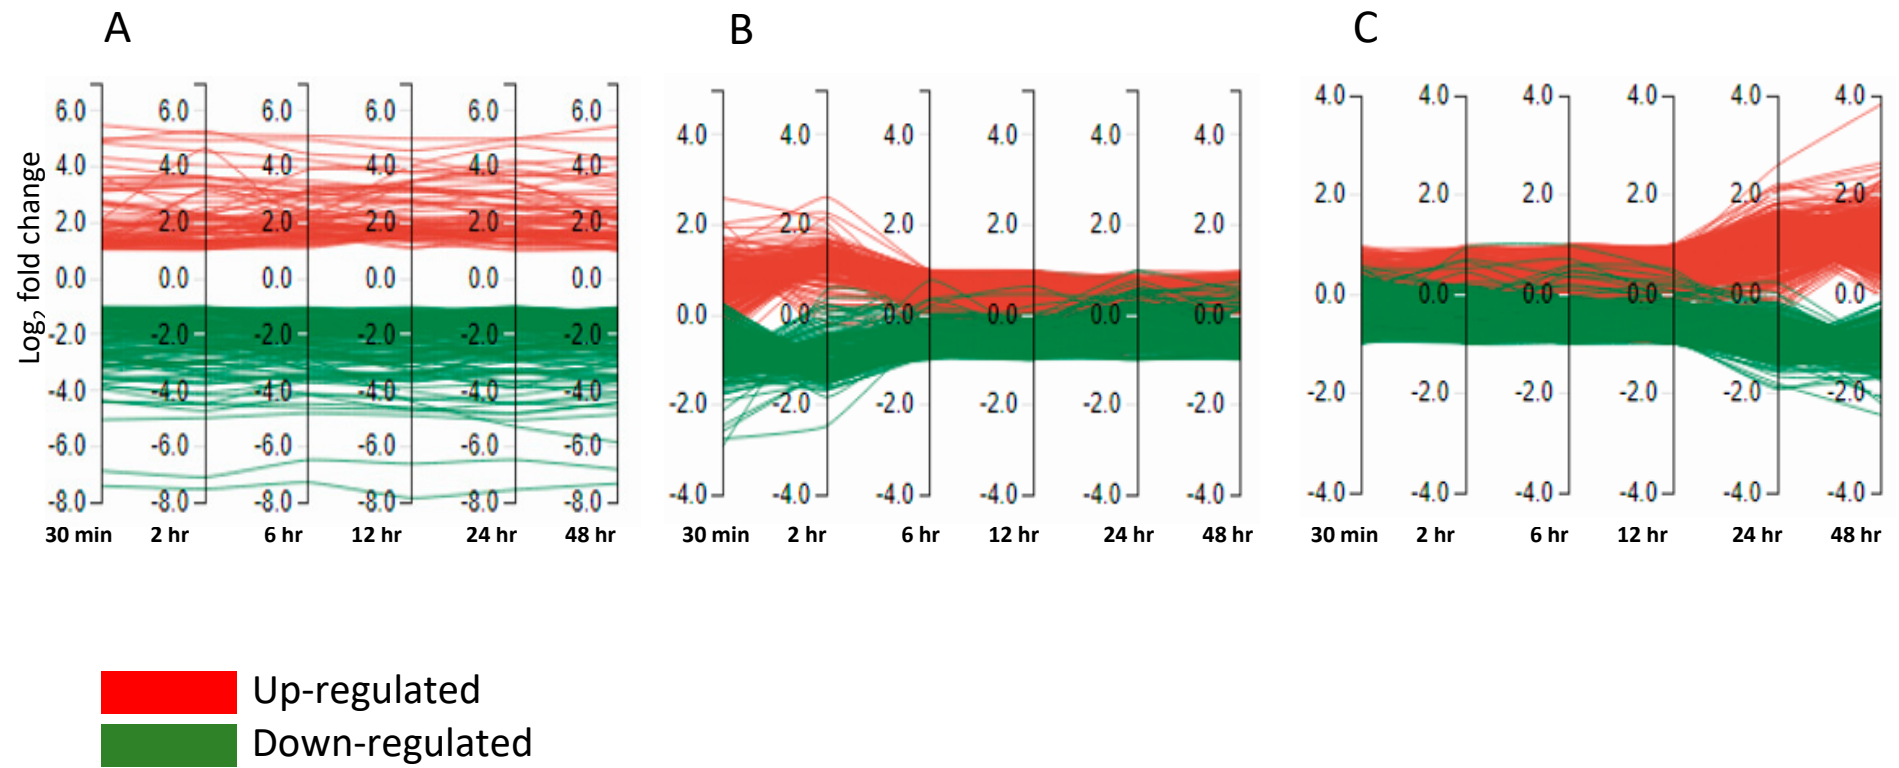

# Figure S4

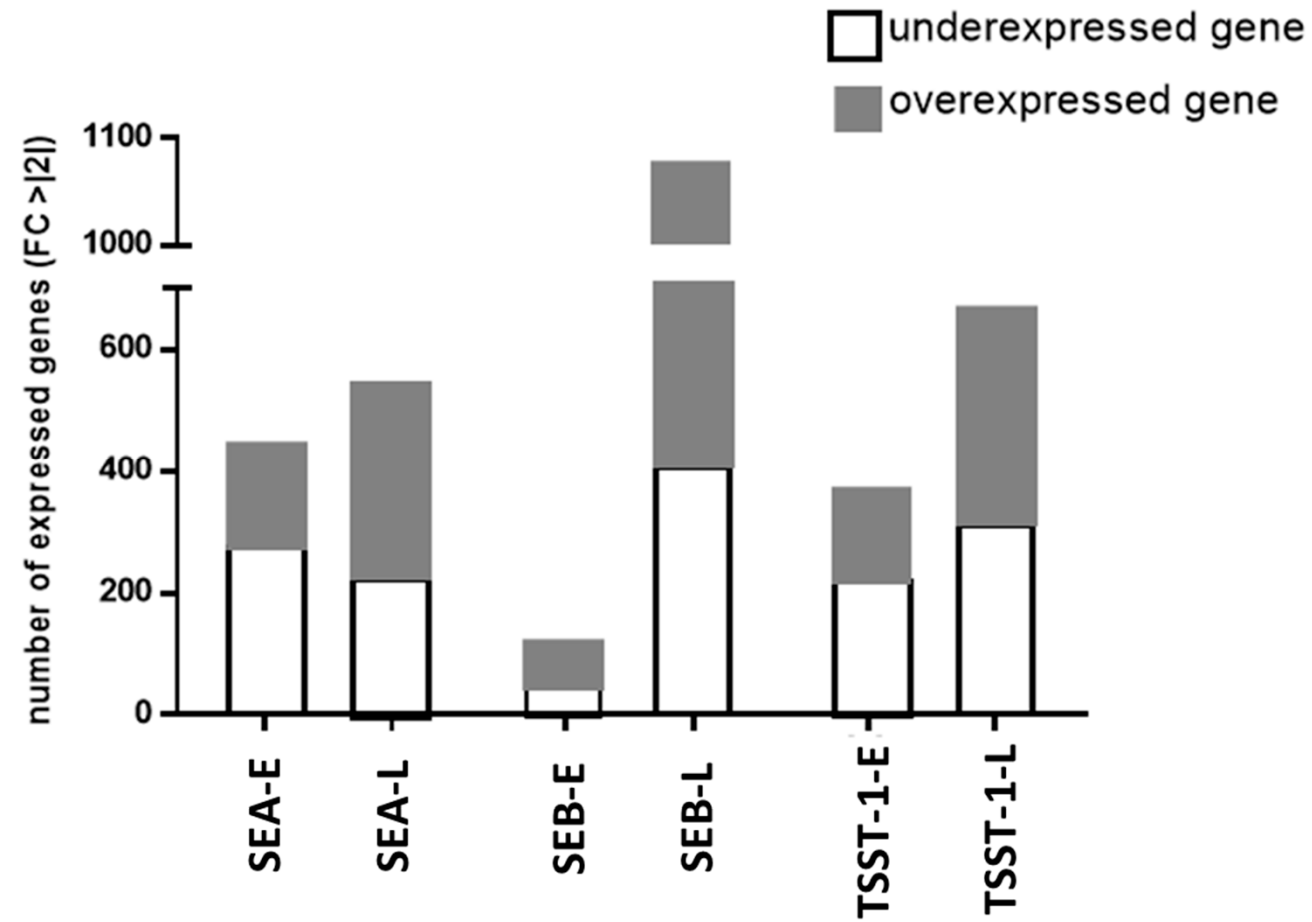

EARLY

# Figure S5A

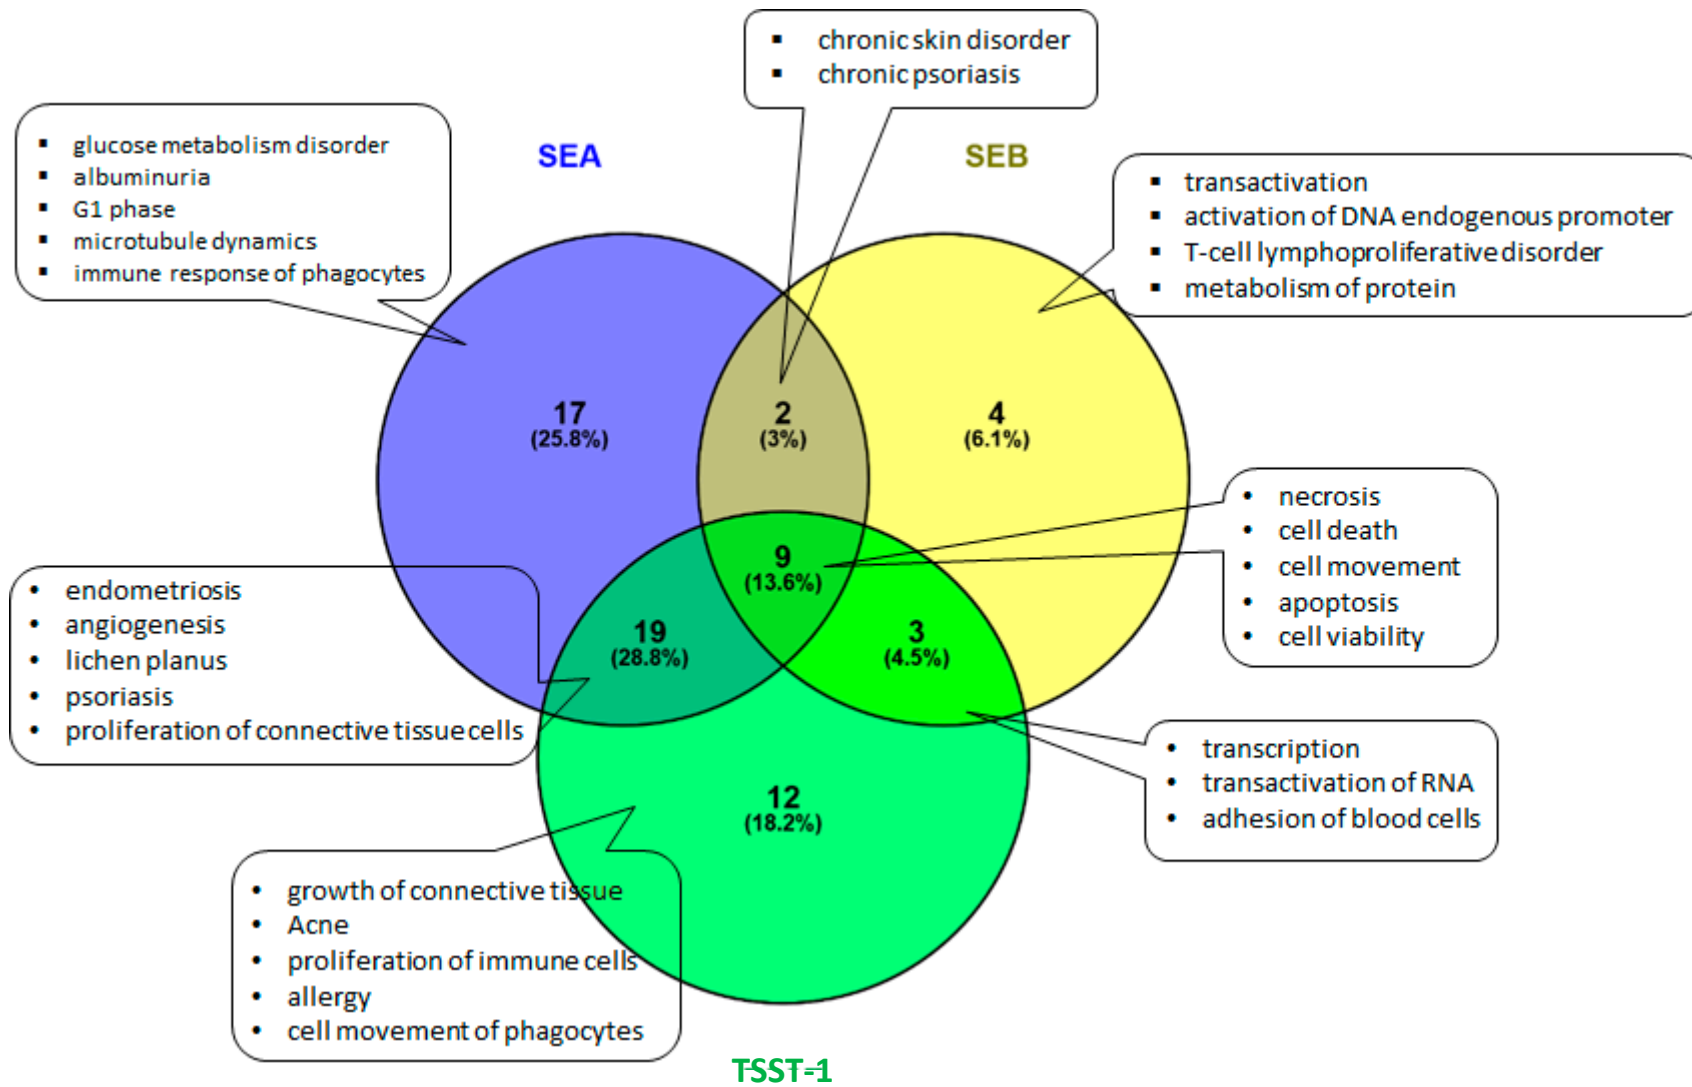

# Figure S5B

LATE

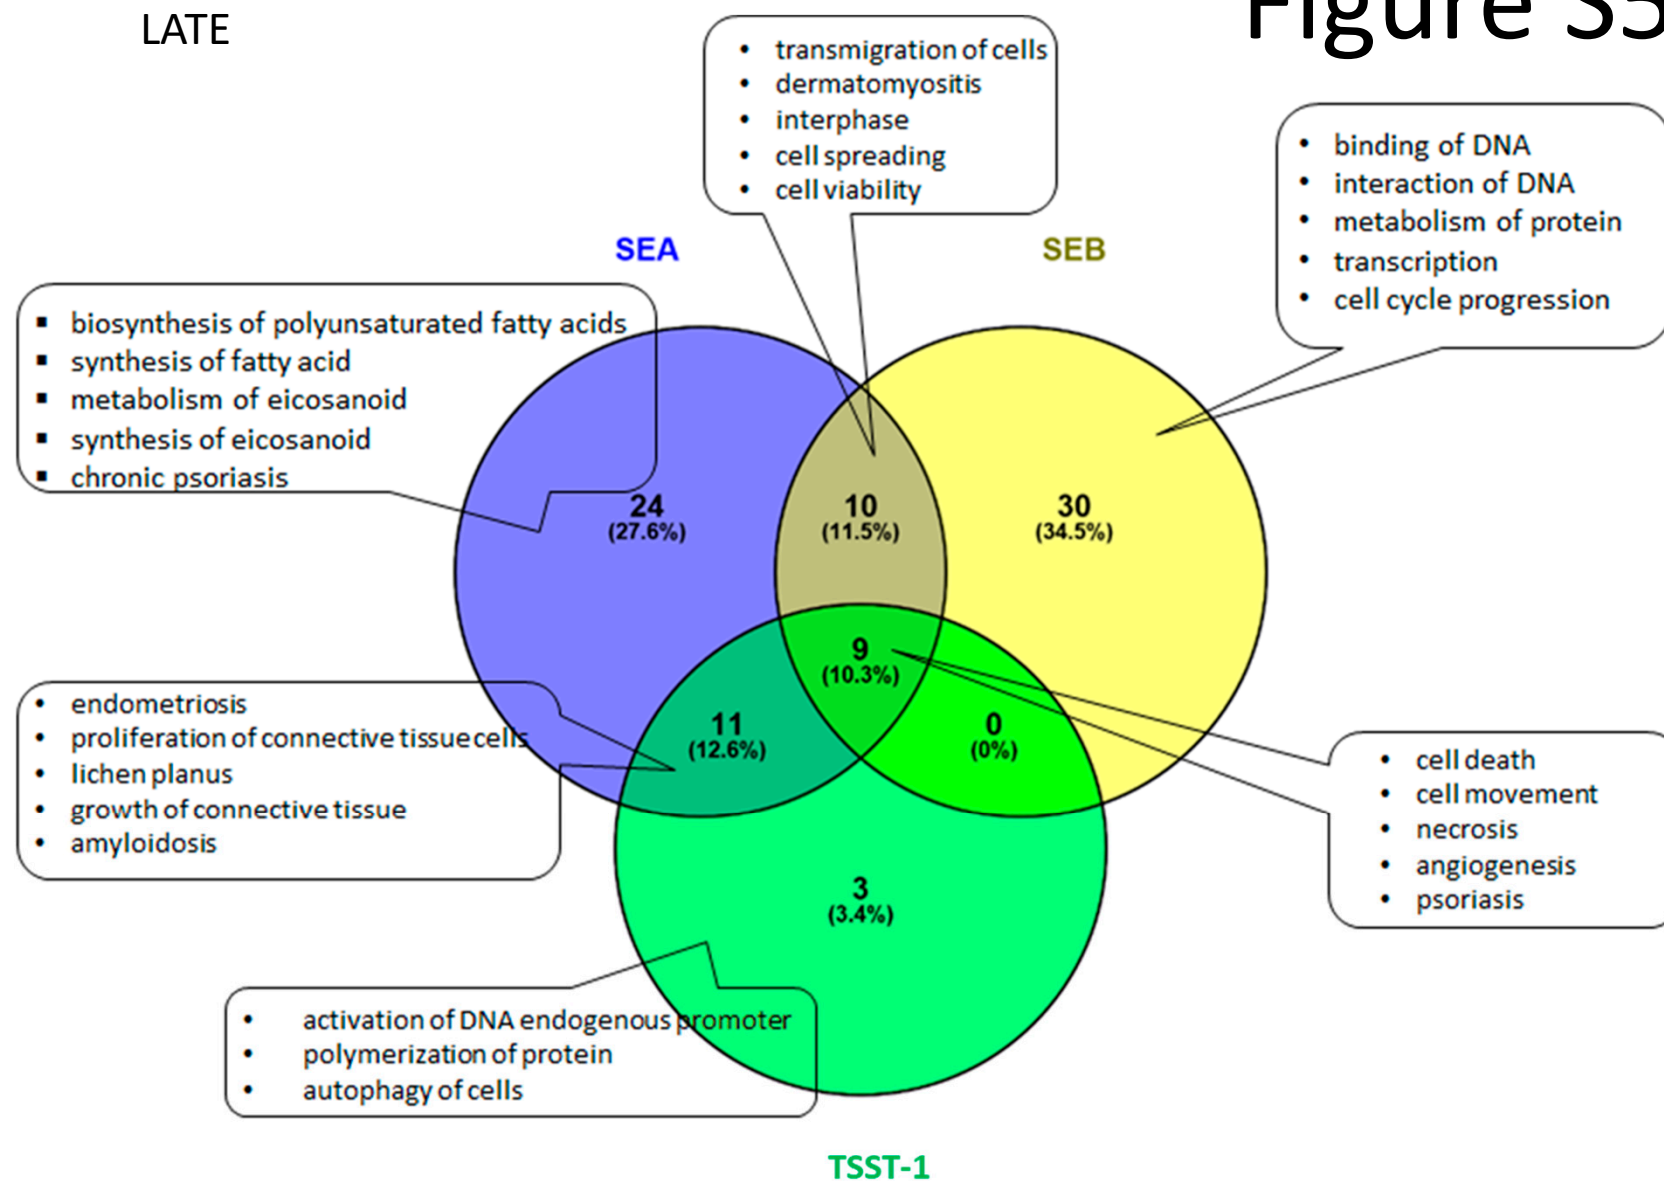

Figure S6

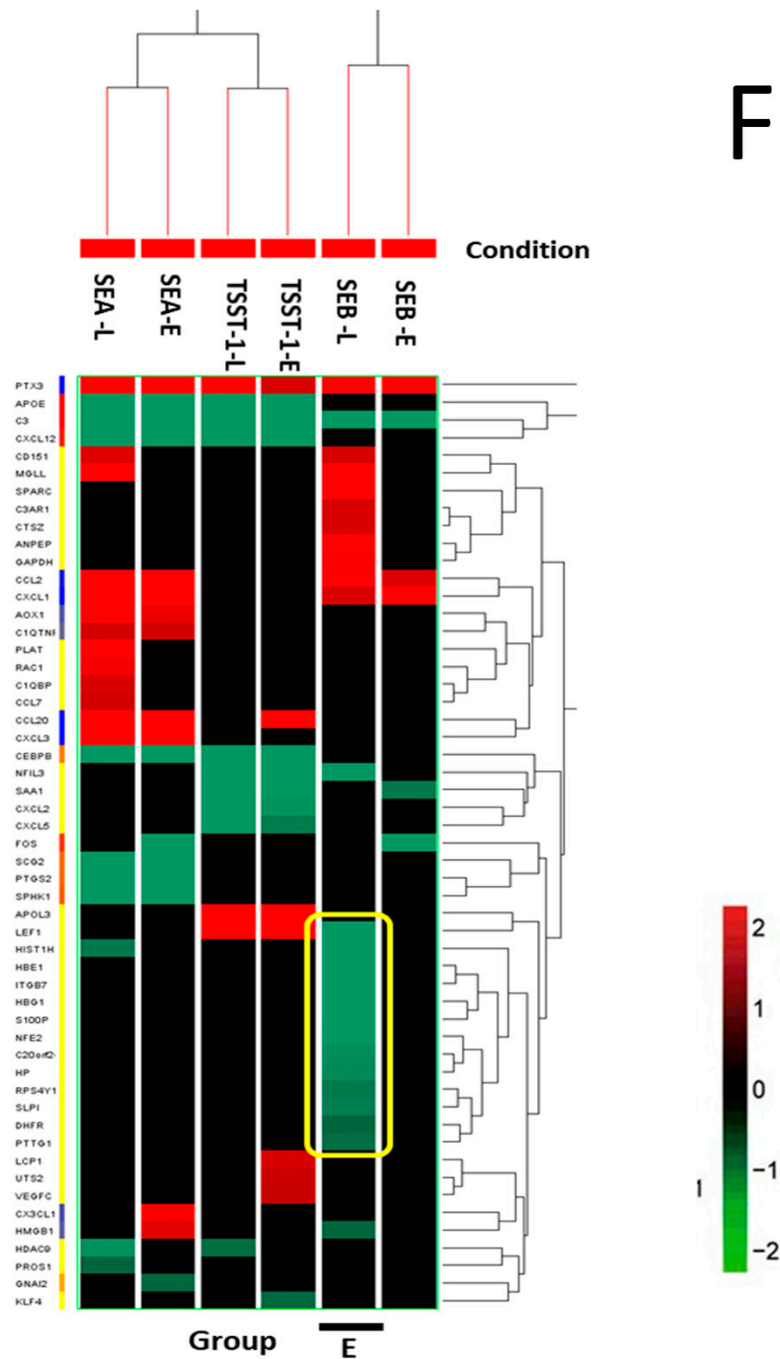

Figure S7

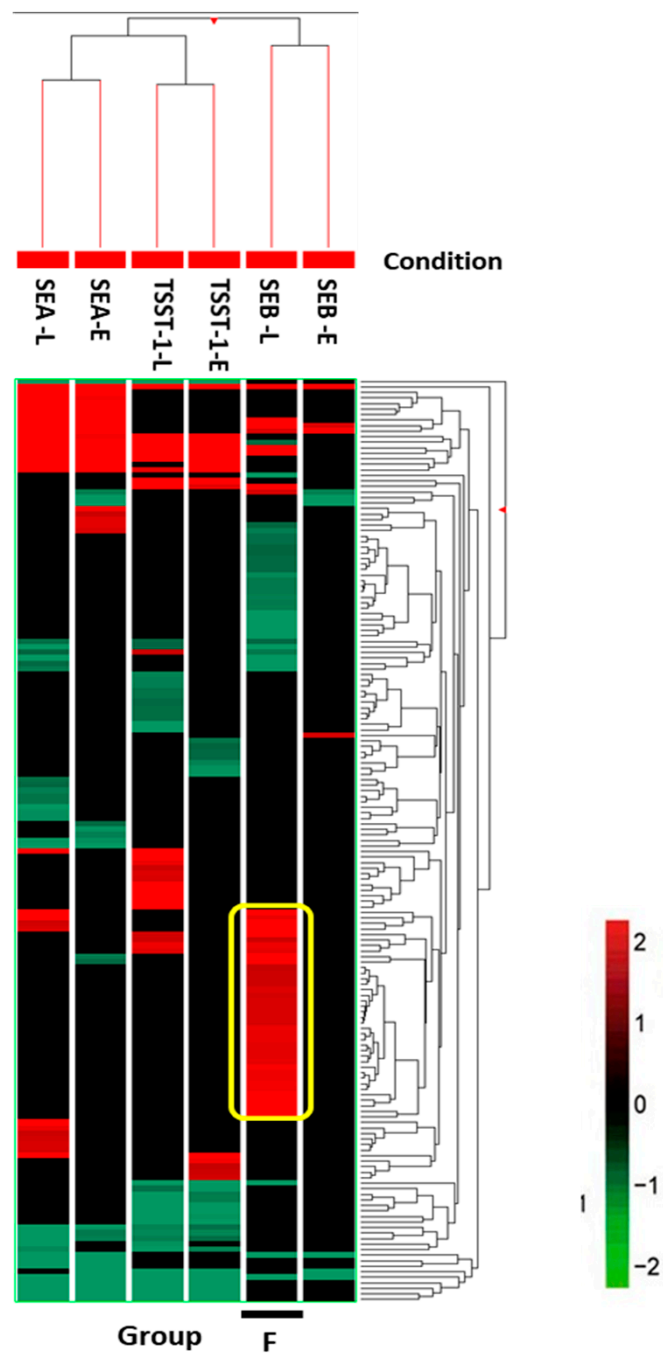



# Figure S8

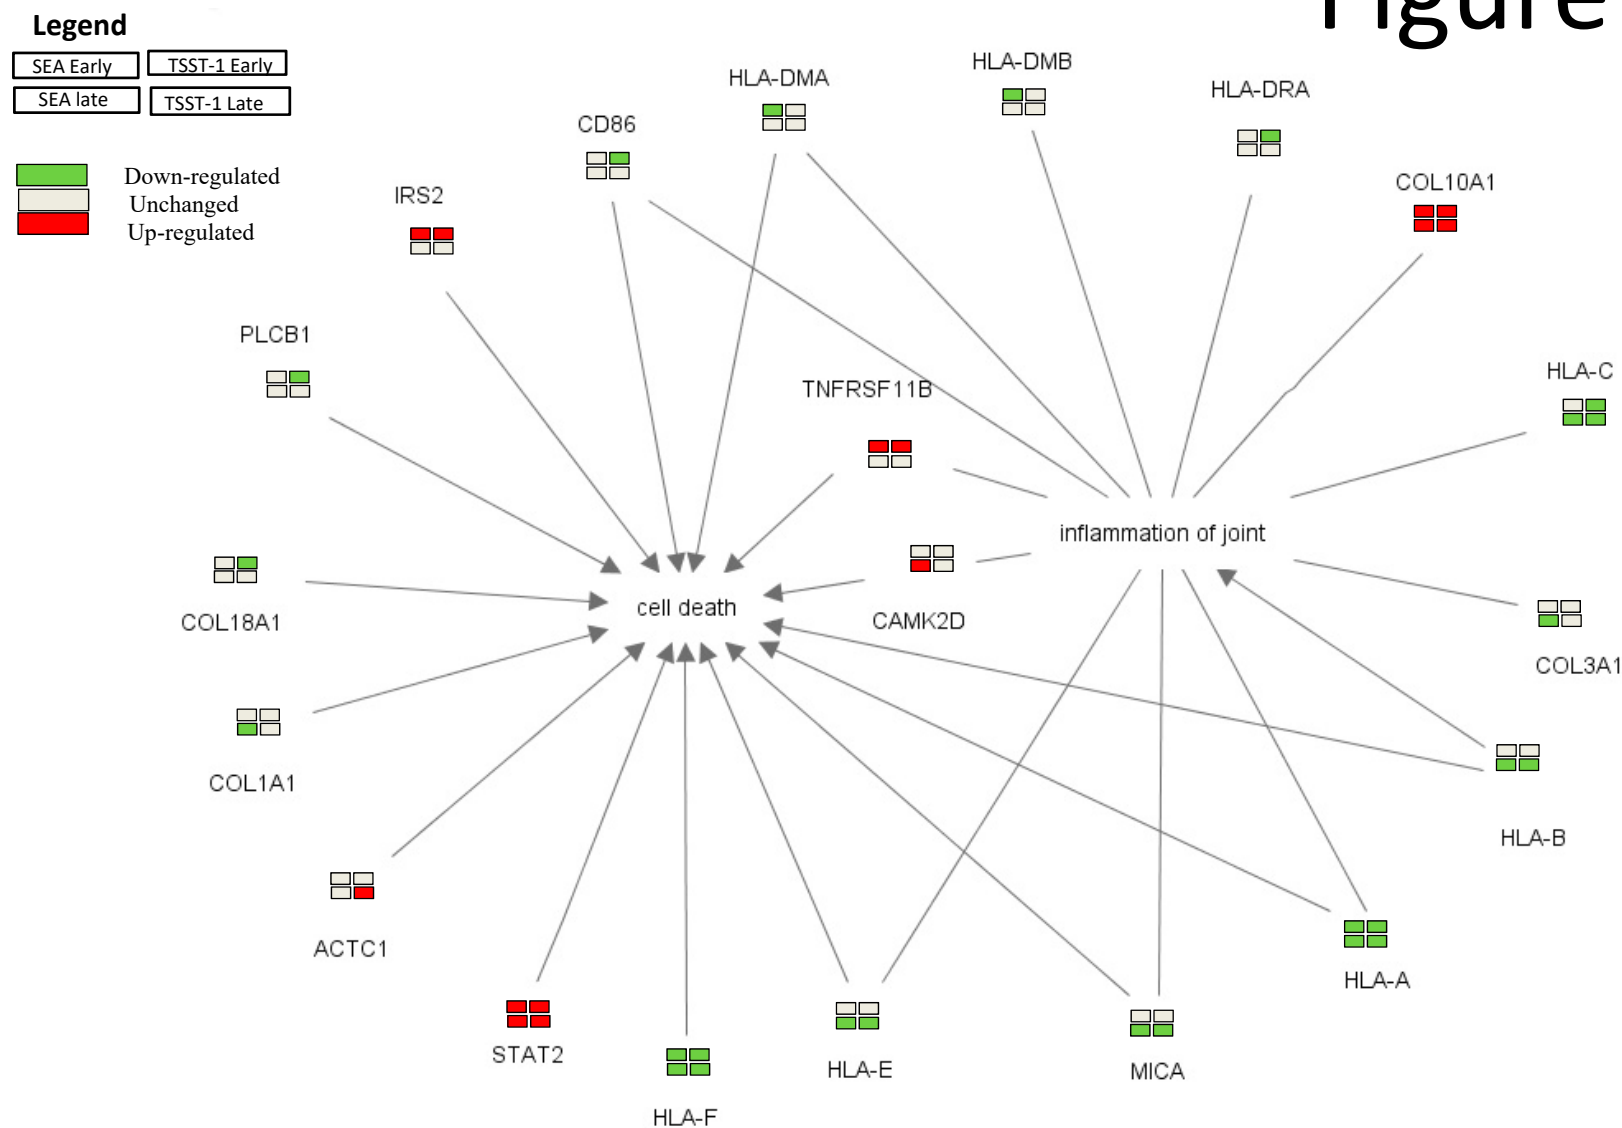

Supplement: s1 [file s1]
